# Supplementary material for: Leukocyte transmigration requires kinesin-mediated microtubule-dependent membrane trafficking from the lateral border recycling compartment
Source: PubMed Central journal article supplement — J Exp Med. 2008 Apr 14;205(4):951–66. doi: 10.1084/jem.20072328 (PMC2292231; doi:10.1084/jem.20072328), 2008-04-14
Supplement: jexpmed_jem.20072328_7.pdf [file jexpmed_jem.20072328_7.pdf]

**Table S1.** Expression of kinesin family members in HUVECs

| Name    | Identifier | RT-PCR         | Immunofluorescence | WB |
|---------|------------|----------------|--------------------|----|
| Kif 1A  | NM_004321  | +              |                    |    |
| Kif 1B  | NM_015074  | +              |                    |    |
| Kif 1C  | NM_006612  | +              |                    |    |
| Kif 2A  | NM_016338  | +              |                    | +  |
| Kif 2C  | NM_006845  | +              | +                  |    |
| Kif 3B  | NM_004798  | +              | +                  | +  |
| Kif 3C  | NM_002254  | +              |                    |    |
| Kif 4   | NM_012310  | +              |                    |    |
| Kif 5B  | NM_004521  | +              | +                  |    |
| Kif 5C  | AB011103   | +              |                    |    |
| Kif 9   | NM_182902  | +              |                    |    |
| Kif 11  | NM_004523  | +              |                    |    |
| Kif 13A | NM_022113  | +              |                    |    |
| Kif 13B | NM_015254  | +              |                    |    |
| Kif 14  | NM_014875  | +              |                    |    |
| Kif 15  | NM_020242  | +              |                    |    |
| Kif 17  | NM_020816  | — <sup>a</sup> | +                  | +  |
| Kif 18  | NM_031217  | +              |                    |    |
| Kif 20A | NM_005733  | +              |                    |    |
| Kif 22  | NM_007317  | +              |                    |    |
| Kif 23  | NM_138555  | +              |                    |    |
| Kif 26A | AB033062   | +              |                    |    |
| Kif C3  | NM_005550  | +              |                    |    |
| KLC1    | NM_005552  | +              |                    |    |
| KLC4    | NM_201521  | +              |                    |    |

Kinesin family members (KIFs) detected in HUVECs. KIF-specific primers were designed, and specificity was verified by BLAST analysis against the human genome. Total RNA was isolated from resting cultured HUVEC monolayers at passage 2 using the RNeasy kit (QIAGEN). cDNA was prepared by RT with Superscript II and oligo-dT (Invitrogen). Each kinesin was amplified by PCR using two sets of specific primers (Jaulin, F., X. Xue, E. Rodriguez-Boulan, and G. Kreitzer. 2007. *Dev. Cell.* 13:511–522). GAPDH or cyclofilin primers were used as controls. Out of the 41 human *KIFs*, the 30 shown in the table were routinely detected in HUVECs. Some of these could be detected by Western blot (WB) and immunofluorescence staining in HUVECs with a limited number of commercially available anti-KIF antibodies. The identifier is the nucleotide accession number (available from GenBank/EMBL/DBJ). <sup>a</sup>PCR was negative for the following kinesins: Kif 5A, Kif 12, Kif 20A, Kif 21A, Kif 21B, Kif 27, and KLC2. PCR was also negative for Kif 17 despite positive immunofluorescence and Western blot.
